# Supplementary material
Source: PubMed Central journal article supplement (PMC3798840)
Supplement: ejhg201333x1.pdf [file ejhg201333x1.pdf]

**Supplementary Table S1.** Histopathological features and *MED12* exon 2 mutation status of 103 histopathological variants of uterine leiomyoma.

| Sample | Diagnosis                     | Mitotic index /10 HPF | Atypia | Cellularity | <i>MED12</i> exon 2 mutation status |
|--------|-------------------------------|-----------------------|--------|-------------|-------------------------------------|
| 1      | Mitotically active            | 5-10                  | 1      | -           | c.107T>G, p.L36R                    |
| 2      | Mitotically active            | 6                     | 0      | -           | c.126_131del6, p.K42_G44delinsN     |
| 3      | Mitotically active            | 10                    | 1      | -           | c.124_156del33, p.K42_S52del        |
| 4      | Mitotically active            | 15                    | 0-1    | -           | c.130G>A, p.G44S                    |
| 5      | Mitotically active            | 15                    | 1      | -           | c.130G>T, p.G44C                    |
| 6      | Mitotically active            | 10-15                 | 1      | -           | c.130G>C, p.G44R                    |
| 7      | Mitotically active            | 9-10                  | 0      | -           | c.130G>C, p.G44R                    |
| 8      | Mitotically active            | 10                    | 1-2    | -           | c.131G>A, p.G44D                    |
| 9      | Mitotically active            | 5-10                  | 1      | -           | c.134_145del12, p.F45_Q48delinsP    |
| 10     | Mitotically active            | 15                    | 1      | -           | wt                                  |
| 11     | Mitotically active            | 10-15                 | 0      | -           | wt                                  |
| 12     | Mitotically active            | 15                    | 1      | -           | wt                                  |
| 13     | Mitotically active            | 10-15                 | 1      | -           | wt                                  |
| 14     | Mitotically active            | 15                    | 0-1    | -           | wt                                  |
| 15     | Mitotically active            | 10                    | 0-1    | -           | wt                                  |
| 16     | Mitotically active            | 10-15                 | 1      | -           | wt                                  |
| 17     | Mitotically active            | 10                    | 0      | -           | wt                                  |
| 18     | Mitotically active            | 13                    | 1      | -           | wt                                  |
| 19     | Mitotically active + cellular | 10-15                 | 1      | ++          | c.131G>A, p.G44D                    |
| 20     | Mitotically active + cellular | 5-10                  | 1      | ++          | wt                                  |
| 21     | Mitotically active + cellular | 10-15                 | 1      | ++          | wt                                  |
| 22     | Mitotically active + Cellular | 10-15                 | 0      | ++          | wt                                  |
| 23     | Mitotically active + cellular | 10                    | 0-1    | ++          | wt                                  |
| 24     | Mitotically active + cellular | 20                    | 1      | +           | wt                                  |
| 25     | Mitotically active + cellular | 10                    | 1      | +           | wt                                  |
| 26     | Mitotically active + cellular | 5-10                  | 0      | ++          | wt                                  |
| 27     | Atypical                      | < 5                   | 1-3    | -           | c.131G>T, p.G44V                    |
| 28     | Atypical                      | < 5                   | 1-2    | +           | c.131G>A, p.G44D                    |
| 29     | Atypical                      | < 5                   | 1-3    | +           | c.131G>A, p.G44D                    |
| 30     | Atypical                      | 5-10                  | 1-3    | +           | wt                                  |
| 31     | Atypical                      | < 5                   | 3      | +           | wt                                  |
| 32     | Atypical                      | < 5                   | 3      | +           | wt                                  |
| 33     | Atypical                      | < 5                   | 3      | -           | wt                                  |
| 34     | Atypical                      | < 5                   | 3      | +           | wt                                  |
| 35     | Atypical                      | < 5                   | 1-2    | +           | wt                                  |
| 36     | Atypical                      | < 5                   | 1-3    | -           | wt                                  |
| 37     | Atypical                      | < 5                   | 1-3    | +           | wt                                  |
| 38     | Atypical                      | < 5                   | 1-3    | +           | wt                                  |
| 39     | Atypical                      | < 5                   | 1-3    | +           | wt                                  |
| 40     | Atypical                      | < 5                   | 3      | +           | wt                                  |

| Sample | Diagnosis | Mitotic index<br>/10 HPF | Atypia | Cellularity | MED12 exon 2 mutation status    |
|--------|-----------|--------------------------|--------|-------------|---------------------------------|
| 41     | Atypical  | < 5                      | 3      | +           | wt                              |
| 42     | Atypical  | < 5                      | 1-3    | +           | wt                              |
| 43     | Atypical  | < 5                      | 1-2    | +           | wt                              |
| 44     | Atypical  | < 5                      | 3      | +           | wt                              |
| 45     | Cellular  | < 5                      | 0      | ++          | IVS1-3_133del37                 |
| 46     | Cellular  | < 5                      | 1      | +           | c.126_134del9, p.K42_F45delinsN |
| 47     | Cellular  | < 5                      | 0-1    | +           | c.130G>T, p.G44C                |
| 48     | Cellular  | < 5                      | 0      | +           | c.131G>A, p.G44D                |
| 49     | Cellular  | < 5                      | 1      | +           | c.131G>A, p.G44D                |
| 50     | Cellular  | < 5                      | 1      | ++          | wt                              |
| 51     | Cellular  | 5                        | 1      | ++          | wt                              |
| 52     | Cellular  | < 5                      | 0      | +           | wt                              |
| 53     | Cellular  | < 5                      | 0      | +           | wt                              |
| 54     | Cellular  | < 5                      | 1      | ++          | wt                              |
| 55     | Cellular  | < 5                      | 0      | ++          | wt                              |
| 56     | Cellular  | < 5                      | 0      | +           | wt                              |
| 57     | Cellular  | < 5                      | 0      | ++          | wt                              |
| 58     | Cellular  | 5                        | 1      | ++          | wt                              |
| 59     | Cellular  | < 5                      | 0-1    | ++          | wt                              |
| 60     | Cellular  | < 5                      | 0      | ++          | wt                              |
| 61     | Cellular  | < 5                      | 1      | ++          | wt                              |
| 62     | Cellular  | < 5                      | 1      | ++          | wt                              |
| 63     | Cellular  | < 5                      | 1-2    | ++          | wt                              |
| 64     | Cellular  | < 5                      | 0      | ++          | wt                              |
| 65     | Cellular  | < 5                      | 1      | +           | wt                              |
| 66     | Cellular  | < 5                      | 1      | +           | wt                              |
| 67     | Cellular  | < 5                      | 0      | +           | wt                              |
| 68     | Cellular  | < 5                      | 1      | ++          | wt                              |
| 69     | Cellular  | < 5                      | 1-2    | ++          | wt                              |
| 70     | Cellular  | 5                        | 0      | ++          | wt                              |
| 71     | Cellular  | 5                        | 1      | +           | wt                              |
| 72     | Cellular  | < 5                      | 1      | +           | wt                              |
| 73     | Cellular  | < 5                      | 0      | ++          | wt                              |
| 74     | Cellular  | < 5                      | 0      | ++          | wt                              |
| 75     | Cellular  | < 5                      | 0      | +           | wt                              |
| 76     | Cellular  | < 5                      | 1      | ++          | wt                              |
| 77     | Cellular  | < 5                      | 1      | +           | wt                              |
| 78     | Cellular  | < 5                      | 0      | +           | wt                              |
| 79     | Cellular  | < 5                      | 0-1    | ++          | wt                              |
| 80     | Cellular  | < 5                      | 0      | ++          | wt                              |
| 81     | Cellular  | < 5                      | 0      | +           | wt                              |
| 82     | Cellular  | < 5                      | 0      | +           | wt                              |
| 83     | Cellular  | < 5                      | 0      | ++          | wt                              |
| 84     | Cellular  | < 5                      | 0      | ++          | wt                              |

| Sample | Diagnosis | Mitotic index<br>/10 HPF | Atypia | Cellularity | MED12 exon 2 mutation status |
|--------|-----------|--------------------------|--------|-------------|------------------------------|
| 85     | Cellular  | < 5                      | 0      | +           | wt                           |
| 86     | Cellular  | < 5                      | 0      | +           | wt                           |
| 87     | Cellular  | < 5                      | 0      | ++          | wt                           |
| 88     | Cellular  | 5                        | 0      | ++          | wt                           |
| 89     | Cellular  | < 5                      | 1      | +           | wt                           |
| 90     | Cellular  | < 5                      | 0      | ++          | wt                           |
| 91     | Cellular  | < 5                      | 0      | ++          | wt                           |
| 92     | Cellular  | < 5                      | 1-2    | ++          | wt                           |
| 93     | Cellular  | < 5                      | 1      | +           | wt                           |
| 94     | Cellular  | 5                        | 0      | ++          | wt                           |
| 95     | Cellular  | < 5                      | 1      | ++          | wt                           |
| 96     | Cellular  | < 5                      | 0      | ++          | wt                           |
| 97     | Cellular  | < 5                      | 0      | ++          | wt                           |
| 98     | Cellular  | < 5                      | 0      | ++          | wt                           |
| 99     | Cellular  | < 5                      | 0      | +           | wt                           |
| 100    | Cellular  | < 5                      | 0      | ++          | wt                           |
| 101    | Cellular  | < 5                      | 0      | ++          | wt                           |
| 102    | Cellular  | < 5                      | 0      | +           | wt                           |
| 103    | Cellular  | < 5                      | 0      | ++          | wt                           |

HPF; high power field
