# Supplementary material
Source: PubMed Central journal article supplement (PMC3798840)
Supplement: ejhg201333x2.pdf [file ejhg201333x2.pdf]

**Supplemental Table S2.** Histopathological features, biallelic inactivation status of *FH*, and somatic *MED12* exon 2 mutation status of 34 uterine leiomyomas from 14 HLRCC patients.

| Family name  | Patient | Tissue material | Mitotic figures / 10 HPF | Atypia | Cellularity              | Orangeophilic nucleoli | Germline <i>FH</i> mutation | <i>FH</i> second hit | Somatic <i>MED12</i> exon 2  | Germline <i>MED12</i> exon 2*** |
|--------------|---------|-----------------|--------------------------|--------|--------------------------|------------------------|-----------------------------|----------------------|------------------------------|---------------------------------|
| FAM-2 (B)    | 3       | FFPE            | 5                        | 0      | +                        | -                      | c.671_672delAG, p.E224fs    | -                    | c.131G>A, p.G44D             | wt                              |
|              |         | FFPE            | NA                       | NA     | NA                       | NA                     | c.671_672delAG, p.E224fs    | -                    | wt                           | wt                              |
|              |         | FFPE            | 7                        | 1      | +                        | -                      | c.671_672delAG, p.E224fs    | LOH                  | wt                           | wt                              |
|              | 7       | fresh frozen    | NA                       | NA     | NA                       | NA                     | c.671_672delAG, p.E224fs    | -                    | c.113-160del48, p.A38_G53del | wt                              |
|              |         | fresh frozen    | 0-1                      | 0      | -                        | -                      | c.671_672delAG, p.E224fs    | LOH*                 | wt                           | wt                              |
|              |         | fresh frozen    | 0-1                      | 0      | -                        | -                      | c.671_672delAG, p.E224fs    | protein deficient*   | wt                           | wt                              |
|              |         | fresh frozen    | 0-1                      | 0      | +                        | -                      | c.671_672delAG, p.E224fs    | -                    | wt                           | wt                              |
|              |         | fresh frozen    | NA                       | NA     | NA                       | NA                     | c.671_672delAG, p.E224fs    | LOH*                 | wt                           | wt                              |
| fresh frozen | 0-1     | 0               | +                        | -      | c.671_672delAG, p.E224fs | LOH*                   | wt                          | wt                   |                              |                                 |
| FAM-3 (C)    | 5       | FFPE            | 0-1                      | 0      | -                        | -                      | c.1027C>T, p.R343X          | LOH**                | wt                           | -                               |
|              |         | FFPE            | 0-1                      | 0      | -                        | -                      | c.1027C>T, p.R343X          | LOH**                | wt                           | -                               |
|              |         | FFPE            | 0-1                      | 0      | +                        | (+)                    | c.1027C>T, p.R343X          | -                    | wt                           | -                               |
|              | 8       | FFPE            | 0-1                      | 1      | +                        | ++                     | c.1027C>T, p.R343X          | LOH                  | wt                           | -                               |
|              |         | FFPE            | NA                       | NA     | NA                       | NA                     | c.1027C>T, p.R343X          | LOH                  | wt                           | -                               |
| FAM-4 (D)    | 10      | FFPE            | 0-1                      | 1      | ++                       | +                      | c.587A>G, p.H196R           | -                    | wt                           | -                               |
|              |         | FFPE            | 0-1                      | 1      | ++                       | ++                     | c.587A>G, p.H196R           | LOH                  | wt                           | -                               |
| FAM-5 (E)    | 1       | FFPE            | 0-1                      | 0      | +                        | -                      | c.587A>G, p.H196R           | - **                 | wt                           | wt                              |
|              |         | FFPE            | 0-1                      | 0      | -                        | +                      | c.587A>G, p.H196R           | - **                 | wt                           | wt                              |
|              |         | FFPE            | 0-1                      | 0      | +                        | +                      | c.587A>G, p.H196R           | - **                 | wt                           | wt                              |
|              |         | FFPE            | 0-1                      | 0      | -                        | -                      | c.587A>G, p.H196R           | - **                 | c.130G>A, p.G44S             | wt                              |
| FAM-1 (M)    | 1       | FFPE            | 0                        | 0      | -                        | -                      | c.671_672delAG, p.E224fs    | LOH                  | wt                           | -                               |
|              | 2       | FFPE            | NA                       | NA     | NA                       | NA                     | c.671_672delAG, p.E224fs    | LOH                  | wt                           | -                               |
|              | 4       | FFPE            | 0-1                      | 1      | ++                       | ++                     | c.671_672delAG, p.E224fs    | -                    | wt                           | -                               |
|              | 17      | FFPE            | NA                       | NA     | NA                       | NA                     | c.671_672delAG, p.E224fs    | LOH**                | wt                           | -                               |
|              | 18      | FFPE            | NA                       | NA     | NA                       | NA                     | c.671_672delAG, p.E224fs    | LOH**                | wt                           | -                               |
|              | 26      | FFPE            | 0-1                      | 1      | ++                       | ++                     | c.671_672delAG, p.E224fs    | LOH                  | wt                           | -                               |
|              | 27      | FFPE            | NA                       | NA     | NA                       | NA                     | c.671_672delAG, p.E224fs    | -                    | wt                           | -                               |
|              |         | FFPE            | 0-1                      | 0      | +                        | -                      | c.671_672delAG, p.E224fs    | -                    | wt                           | -                               |
| FAM-9 (N)    | 7       | fresh frozen    | 0-1                      | 0      | -                        | -                      | c.1027C>T, p.R343X          | LOH**                | wt                           | -                               |
|              |         | fresh frozen    | NA                       | NA     | NA                       | NA                     | c.1027C>T, p.R343X          | LOH**                | wt                           | -                               |
|              |         | fresh frozen    | 0-1                      | 0      | +                        | -                      | c.1027C>T, p.R343X          | c.959C>A, p.A320D**  | wt                           | -                               |
|              |         | fresh frozen    | 0-1                      | 0      | +                        | -                      | c.1027C>T, p.R343X          | c.959C>A, p.A320D**  | wt                           | -                               |
|              |         | fresh frozen    | 0-1                      | 0      | -                        | -                      | c.1027C>T, p.R343X          | c.302G>C, p.R101P**  | wt                           | -                               |
|              |         | fresh frozen    | 0-1                      | 0      | +                        | -                      | c.1027C>T, p.R343X          | c.554A>T, p.Q185L**  | wt                           | -                               |

FFPE; formalin-fixed paraffin-embedded, HPF; high power field, NA; not available (tumor too small or block not available), LOH; loss of heterozygosity, \*From Vanharanta et al. 2006, \*\*Unpublished data, \*\*\*Determined when a tumor with a *MED12* exon 2 mutation was identified
