# Supplementary material
Source: PubMed Central journal article supplement (PMC3798840)
Supplement: ejhg201333x3.pdf [file ejhg201333x3.pdf]

**Supplemental Table 3.** *MED12* exon 2 mutation status for 69 common leiomyomas.

| <b>Sample</b> | <b><i>MED12</i> exon 2 mutation status</b> |
|---------------|--------------------------------------------|
| 1             | wt                                         |
| 2             | c.131_139del9, p.G44_N47delinsD            |
| 3             | c.131G>A, p.G44D                           |
| 4             | c.131G>A, p.G44D                           |
| 5             | c.131G>C, p.G44A                           |
| 6             | IVS1-8T>A, p.E33_D34insPQ                  |
| 7             | c.131G>A, p.G44D                           |
| 8             | c.130G>C, p.G44R                           |
| 9             | c.131G>A, p.G44D                           |
| 10            | IVS1-8T>A, p.E33_D34insPQ                  |
| 11            | wt                                         |
| 12            | c.126_127ins3, p.V41_K42insK               |
| 13            | c.131G>A, p.G44D                           |
| 14            | c.130G>A, p.G44S                           |
| 15            | c.131G>A, p.G44D                           |
| 16            | c.131G>A, p.G44D                           |
| 17            | c.131G>A, p.G44D                           |
| 18            | c.130G>A, p.G44S                           |
| 19            | wt                                         |
| 20            | c.131G>A, p.G44D                           |
| 21            | wt                                         |
| 22            | wt                                         |
| 23            | wt                                         |
| 24            | wt                                         |
| 25            | c.130G>T, p.G44C                           |
| 26            | c.131G>A, p.G44D                           |
| 27            | c.131G>A, p.G44D                           |
| 28            | c.131G>A, p.G44D                           |
| 29            | c.117-134del18, p.L39_G44delinsF           |
| 30            | wt                                         |
| 31            | IVS1-22_102del25                           |
| 32            | c.131G>A, p.G44D                           |
| 33            | wt                                         |
| 34            | wt                                         |
| 35            | wt                                         |
| 36            | wt                                         |
| 37            | wt                                         |
| 38            | c.130G>T, p.G44C                           |
| 39            | wt                                         |
| 40            | wt                                         |
| 41            | c.107T>G, p.L36R                           |
| 42            | wt                                         |

| <b>Sample</b> | <b><i>MED12</i> exon 2 mutation status</b> |
|---------------|--------------------------------------------|
| 43            | c.122T>A, p.V41E                           |
| 44            | wt                                         |
| 45            | wt                                         |
| 46            | wt                                         |
| 47            | c.131G>A, p.G44D                           |
| 48            | IVS1-11_IVS1-2del10                        |
| 49            | c.131G>A, p.G44D                           |
| 50            | c.146_166del21, p.P49_E55del               |
| 51            | wt                                         |
| 52            | c.131G>A, p.G44D                           |
| 53            | c.130G>C, p.G44R                           |
| 54            | wt                                         |
| 55            | wt                                         |
| 56            | wt                                         |
| 57            | c.141_155del15, p.Q48_S52del               |
| 58            | c.128A>C, p.Q43P                           |
| 59            | wt                                         |
| 60            | c.131G>A, p.G44D                           |
| 61            | wt                                         |
| 62            | c.107T>G, p.L36R                           |
| 63            | wt                                         |
| 64            | wt                                         |
| 65            | c.131G>A, p.G44D                           |
| 66            | wt                                         |
| 67            | c.130G>C, p.G44R                           |
| 68            | c.100_117del18, p.D34_L39del               |
| 69            | c.131G>T, p.G44V                           |
